# Supplementary material for: A novel ALE scheme with the internal boundary for true free surface simulation in geodynamic models
Source: Copernicus journal article supplement (doi:10.5194/egusphere-2025-6323), 2026-01-23
Supplement: Supplementary file [file egusphere-2025-6323-AC1-supplement.pdf]

## Responses to RC1

Neng Lu

G1, what the advantage of the ALE IB is over the conventional ALE? I would like to see some more discussion about ALE vs ALE IB, because they seem like the two real contenders.

Response: Generally, the ALE-IB scheme offers similar, though slightly less, accuracy compared to ALE and also encounters frequent remeshing challenges. However, it has several advantages: (1) It maintains stable and realistic surface evolution, even in challenging scenarios such as large asymmetric deformations (see Figure 7 in Experiment 3: Delamination). (2) By placing the free surface at the internal boundary of the computational domain, it effectively handles issues related to space constraints when moving particles. This is particularly beneficial when considering coupling with surface processes or other factors that reshape the surface, involving complex materials (such as air, rock, and sediments) exchanges. We have a related paper discussing the coupling framework within this ALE-IB approach (Lu et al., 2026).

G2, I do not think, however, that the performed experiments are sufficient to assess which method is most stable. Firstly, the issue is that numerical stability has not been properly defined. Secondly, if the authors really want to convince that their proposed method is more stable than conventional methods (i.e, than the ALE and Eulerian methods) then this should be motivated by either theoretical arguments (which I recon is quite challenging and may be outside the scope the paper), or by performing a proper numerical investigation where the time-step size is compared the norm of a evant prognostic output variable (e.g., the surface height). However, I only think such a study is interesting if the authors have reason to believe there are other sources of instability than overstepping the relaxation time (which is already taken care of by the FSSA), and which are ameliorated by the ALE IB method. If other sources of numerical instability are present, then this should be clearly communicated.

Response: We have included descriptions of numerical stability and the L2 norm test in Experiment 1: Topography Relaxation Models, as these allow for comparison with the analytical solution. Generally, the ALE-IB scheme is slightly less accurate than ALE but more accurate than the Eulerian method in this experiment. All methods experience the 'drunken sailor' instability, which can be addressed by implementing the Free Surface Stabilization Algorithm (FSSA) like the ones in Kaus et al. (2010). Both ALE and ALE-IB are able to use a simplified version of FSSA, as detailed by Andrés-Martínez et al. (2015), to apply stress boundary conditions only on the free surface (the top boundary in ALE

and the internal boundary in ALE-IB). Since their paper provides an in-depth discussion of FSSA, we have not extended this discussion further here.

G3 Relating to General comment 2, I'm curious about Experiment 3, where you find ALE IB to be more stable than ALE. I'm wondering if you also experimented with different FSSA parameter, and if potentially a different choice control parameter would have influenced this conclusion? Also, it was not clear to me whether you also used the FSSA for the ALE and Eulerian methods, and in those cases did you use the Kaus, Mühlhaus, and May (2010) version?

Response: In our experiments, we did not use the FSSA, except for the test in Experiment 1 shown in Figure 5. Instead, we used a small time step to avoid the 'drunken sailor' issue. In Experiment 3, the ALE method exhibits strong asymmetry and fails to converge, even with a small time step, due to the presence of denser material on the left half of the model. Conversely, the ALE-IB method handles this instability effectively because the top boundary over the air layer is free-slip, fixing the vertical velocity, which stabilizes the layers below.

We conducted tests with different FSSA parameters and found that a parameter value of 0.5 was empirically better in our cases. However, as discussed in other papers, the optimal choice might be 2/3 or another value. Therefore, we did not include further tests regarding these parameters in our paper, as it is not the main discussion point. The FSSA used in Experiment 1 within ALE-IB demonstrates this scheme has the ability to handle a simplified FSSA version (similar like the one in Andrés-Martínez et al. (2015)). The Kaus2010 version of FSSA has been implemented in UW2 within an Eulerian scheme (but not suitable for methods ALE or ALEIB that involving mesh deformation), which are not used in the models of the paper.

G4, I'm missing a quantitative accuracy comparison between the proposed scheme and conventional methods. In particular, I would like to see Fig. 5 supplemented with plots of the error for the other methods (i.e., ALE and Eulerian).

Response: We added the plots of the results from other methods.

G5, Section 2.1 is incomplete and should be supplemented with a brief explanation of the physical meaning behind each equation (including boundary conditions). I also think the part of Sect. 4.5, should be included in Sect. 2.1, because in the current form it requires skipping back-and-forth between the sections to disentangle how Eq. (1a) reduces to an equation for the velocity and the pressure. Furthermore, I find it unnecessarily complicated to introduce three different tensors.

Response: We have extended Section 2.1 to include more explanations about the physical meaning. We retained Section 4.5, as the subduction experiment is the only model using non-linear viscosity and temperature-dependent density. All other experiments use linear viscosity and density. We also made adjustments to Equation 1a regarding the tensor definitions.

**Specific comments:**

P2:L34, removed the equation.

P3:Eq. (1c) Maybe this is standard notation, but I find it slightly confusing to refer to

the heat production as  $H$  as this could be mistaken for a geometric parameter. Perhaps  $Q$  is more appropriate/standard?

Response:  $H$  is more commonly used, so we kept it for consistency with other references Moresi et al. (2007); Cramereri et al. (2017). And we prefer using  $h$  to denote height.

P3:L74, corrected to 'identity matrix'.

P4:L106–109, add the explanation of the physical significance of the isostatic compensation factor. " $C_{\text{isost}}$  is a nondimensional combination of geometric and material parameters that quantifies the ratio of dynamic stresses to the static pressure scale set by the system."

P4:L106–109, You state there are multiple conditions that should be satisfied, however, I only see the single condition  $C_{\text{isost}} \ll 1$  mentioned? Did you also at some point verify that this is the case? I think this could be interesting for the reader to know.

Response: We reference Cramereri et al. (2012) to emphasize that our chosen thickness and viscosity for the sticky air layer comply with these fundamental requirements, ensuring the accuracy of our results. There are other conditions such as  $C_{\text{stokes}} \ll 1$ , as thoroughly discussed in Cramereri et al. (2012). We verified that when these conditions are met, the results align with the increased accuracy mentioned in their paper.

P6:Eq. (9) What is  $\Gamma$  (it has not been introduced), or do you mean  $\Gamma_{fs}$ ? Also since you are using the FEM I expect there to be a test function?

Response:  $\Gamma$  denotes the boundary surface, and  $fs$  is short for the free surface. The test function  $N_i$  can be find in details in Moresi et al. (2003).

P6:L153–154 ...the optimal values is 0.5 : This needs to be motivated and/or backed by a reference. And in what sense is it optimal?

Response: We added the relevant reference Kaus et al. (2010). The optimal value can be complex, as discussed in Andrés-Martínez et al. (2015), so we do not elaborate further. However, using a value of 0.5 yields results that are closer to the analytical solution compared to a value of 1, same as mentioned in Kaus et al. (2010).

P7:L175 When  $\lambda \neq D$ ,  $t \approx t_0$ . Can you please clarify the interpretation of  $t_0$  and why it is interesting to note?

Response:  $t_0$  is the simplified version of  $t$  in mathematical terms when  $\lambda \neq D$ . In many studies,  $t_0$  is primarily used as the relaxation time.

P8:L215 If the sides are not subject to periodic boundary conditions, then what are they subject to?

Response: The boundary condition is set to free slip on the left and right walls to ensure consistency with other experiments in our paper.

P9:L229 It seems like you are using the same symbol to denote both the effective strain-rate and the strain rate tensor? Response: corrected.

P9:Eq. (16) Equation for what? And could you please clarify in what sense it is nonlinear? Maybe I'm missing something, but you state that the viscosity is strain-

rate dependent, at the same time from Table 1 it says that  $n = 1$ . To me this seems contradictory. Could please clarify what type of rheology you are using, i.e., is it linear ( $n = 1$ ) or nonlinear ( $n \neq 1$ ) and in the latter case, what is the value of  $n$ ?

Response: For temperature-dependent rheology. Here, we use  $n=1$  and have made adjustments to the equation for clarity.

P9:L233–234 The effective strain-rate was already defined in line 229. Response: corrected and removed it.

P9:L244 If the age-law is standard, I expect there to be a reference. Response: added the reference, and remove the 'standard' description.

P10:L283 How do you define the Courant criterion?

Response: The Courant–Friedrichs–Lewy (CFL) condition is a necessary stability criterion for solving partial differential equations numerically, requiring that the simulation's time step  $\Delta t$  is small enough for information to travel less than one grid cell  $\Delta x$  per step. It is defined by the Courant number:  $C = \frac{u\Delta t}{\Delta x} \leq 1$ .

P11:L298 Relating to General comment 2: What is the meaning of strong in stabilities, to me a numerical instability is the unbounded growth of perturbations. I would assume they are always strong. I suggest simply noting the presence of numerical oscillations, or something along that line.

Response: In this context, the instability indicates that, in the ALE method, the delamination model does not deform like the delamination itself. Instead, it exhibits a strong counter-clockwise deformation pattern. We have added adjustments accordingly.

P17:Fig. 1 This is a useful figure, but real and virtual interfaces needs explanation. Response: Added more explanations. "The real interface refers to the actual free surface, while the virtual interface represents the surface obtained from numerical modelling."

P19:Fig. 3 What is the meaning of the outer path? Response: It denotes the next step in the loop.

#### **Technical corrections:**

P8:L201–202, Corrected to 'centred at'

P8:L215, removed 'initial stabilization'

P19:Fig. 3, Corrected 'verticial' to 'vertical'

P19:Fig. 5, Corrected  $dt$  to  $\Delta t$

P25:Fig. 9, written as (b–d).

Figures The figures look mostly good, but the font size of e.g., ticks and labels could be increased. Secondly, from an accessibility perspective, red, green, and blue may not be such a color-blind friendly choice.

Response: Increased the font size, and changes colours to colour-blind friendly choice.

## References

- Andrés-Martínez, M., Morgan, J. P., Pérez-Gussinyé, M., and Rüpké, L. (2015). A new free-surface stabilization algorithm for geodynamical modelling: Theory and numerical tests. *Physics of the Earth and Planetary Interiors*, 246:41–51.
- Cramer, F., Lithgow-Bertelloni, C., and Tackley, P. J. (2017). The dynamical control of subduction parameters on surface topography. *Geochemistry, Geophysics, Geosystems*, 18(4):1661–1687.
- Cramer, F., Schmeling, H., Golabek, G., Duretz, T., Orendt, R., Buiter, S., May, D., Kaus, B., Gerya, T., and Tackley, P. (2012). A comparison of numerical surface topography calculations in geodynamic modelling: an evaluation of the ‘sticky air’ method. *Geophysical Journal International*, 189(1):38–54.
- Kaus, B. J., Mühlhaus, H., and May, D. A. (2010). A stabilization algorithm for geodynamic numerical simulations with a free surface. *Physics of the Earth and Planetary Interiors*, 181(1-2):12–20.
- Lu, N., Moresi, L., Giordani, J., and Knight, B. (2026). A novel ale scheme with the internal boundary for coupling tectonic and surface processes in geodynamic models. *EGU sphere*, 2026:1–35.
- Moresi, L., Dufour, F., and Mühlhaus, H.-B. (2003). A lagrangian integration point finite element method for large deformation modeling of viscoelastic geomaterials. *Journal of computational physics*, 184(2):476–497.
- Moresi, L., Quenette, S., Lemiale, V., Meriaux, C., Appelbe, B., and Mühlhaus, H.-B. (2007). Computational approaches to studying non-linear dynamics of the crust and mantle. *Physics of the Earth and Planetary Interiors*, 163(1-4):69–82.
